# Supplementary material for: Evolution of herbivore-induced early defense signaling was shaped by genome-wide duplications in Nicotiana
Source: eLife journal article supplement (doi:10.7554/elife.19531), 2016-11-04
Supplement: supp [file elife-19531-supp-v1.zip]

Archive with 9 entries (9 files):
- elife_poa_e19531_Figure_5_figure_supplement_1.pdf
- elife_poa_e19531_Figure_1_figure_supplement_2.pdf
- elife_poa_e19531_Figure_1_figure_supplement_1.pdf
- elife_poa_e19531_Source_Code.zip
- elife_poa_e19531_Figure_6_figure_supplement_1.pdf
- elife_poa_e19531_Supplementary_file_1.docx
- elife_poa_e19531_Figure_2_figure_supplement_1.pdf
- elife_poa_e19531_Figure_7_figure_supplement_2.pdf
- elife_poa_e19531_Figure_7_figure_supplement_1.pdf
