# Supplementary figures and images for: Evolution of herbivore-induced early defense signaling was shaped by genome-wide duplications in Nicotiana
Source: eLife journal article supplement (doi:10.7554/elife.19531), 2016-11-04

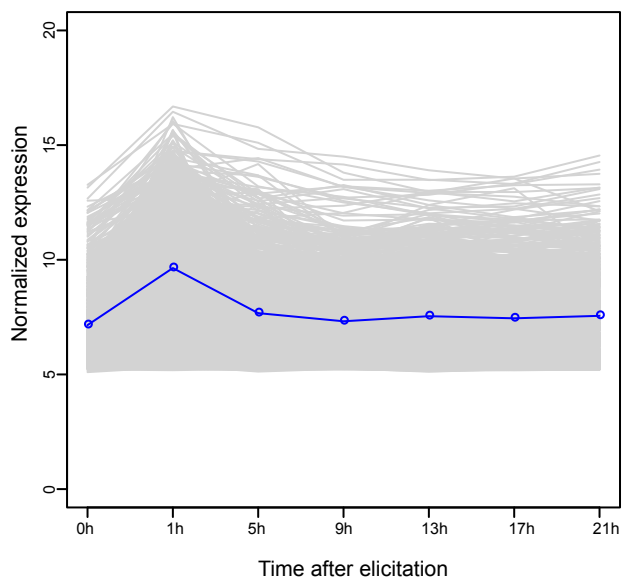

Supplement: supp [file elife-19531-supp-v1.zip]

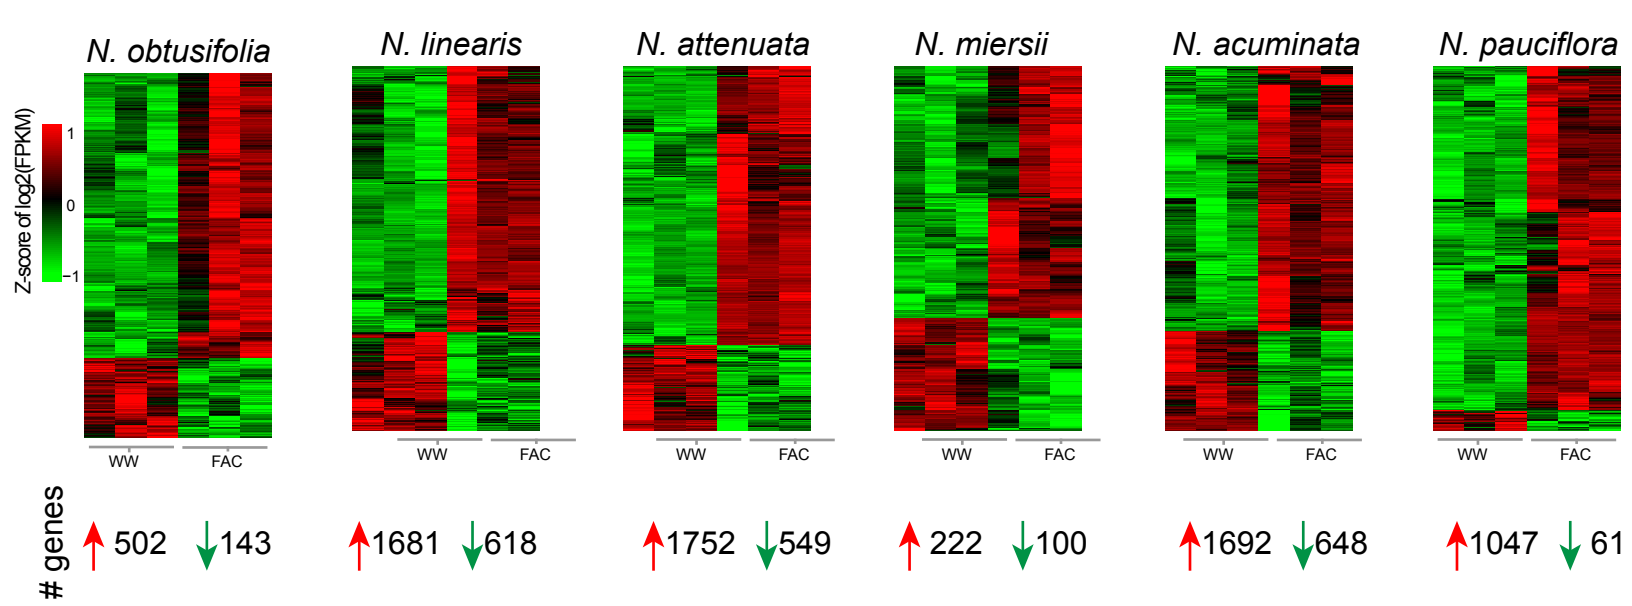

Supplement: supp [file elife-19531-supp-v1.zip]

**a**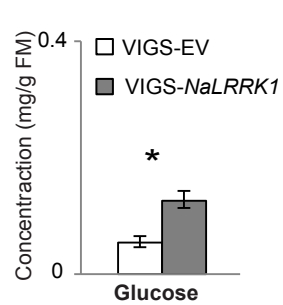**b**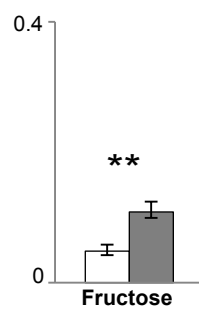**c**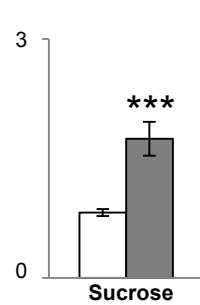**d**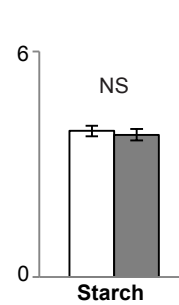**e**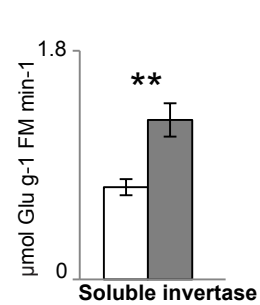

Supplement: supp [file elife-19531-supp-v1.zip]

**a**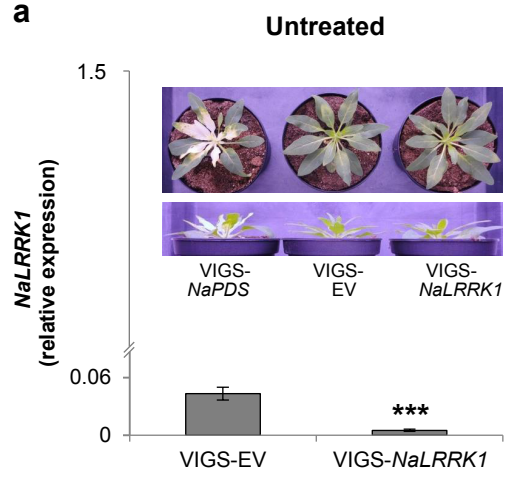**b**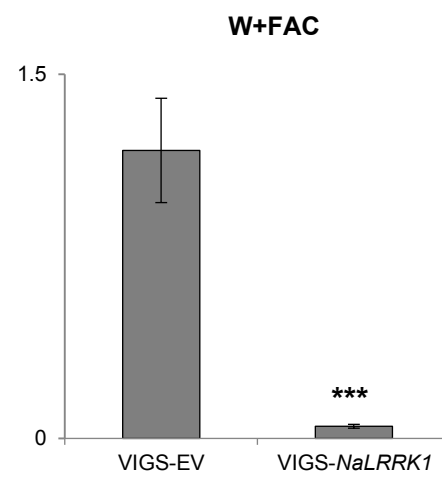

Supplement: supp [file elife-19531-supp-v1.zip]

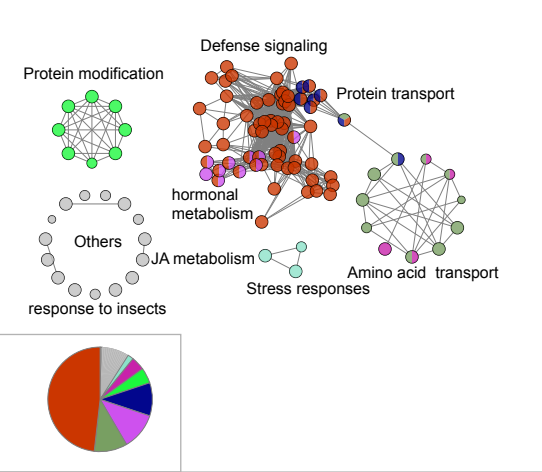

Supplement: supp [file elife-19531-supp-v1.zip]

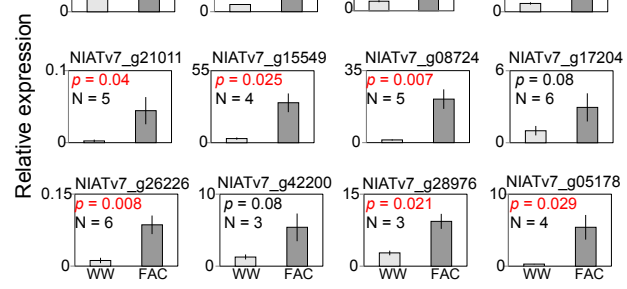

Supplement: supp [file elife-19531-supp-v1.zip]

**a**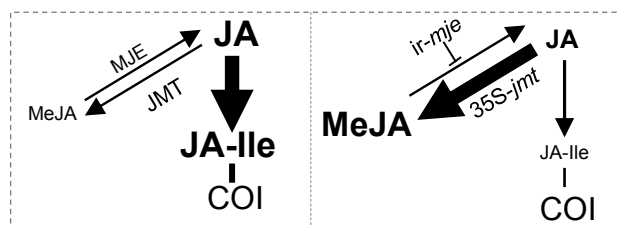**b**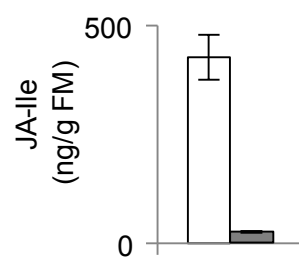**c**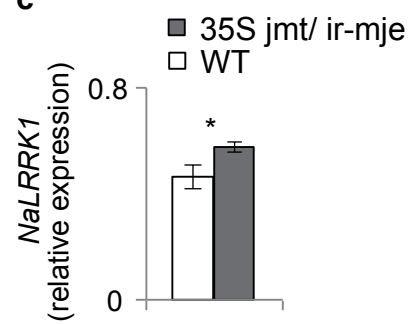

Supplement: supp [file elife-19531-supp-v1.zip]
